# Supplementary material for: Asymmetric Engagement of Amygdala and Its Gamma Connectivity in Early Emotional Face Processing
Source: PLOS journal article supplement (doi:10.1371/journal.pone.0115677), 2015-01-28

# A Angry facial expression

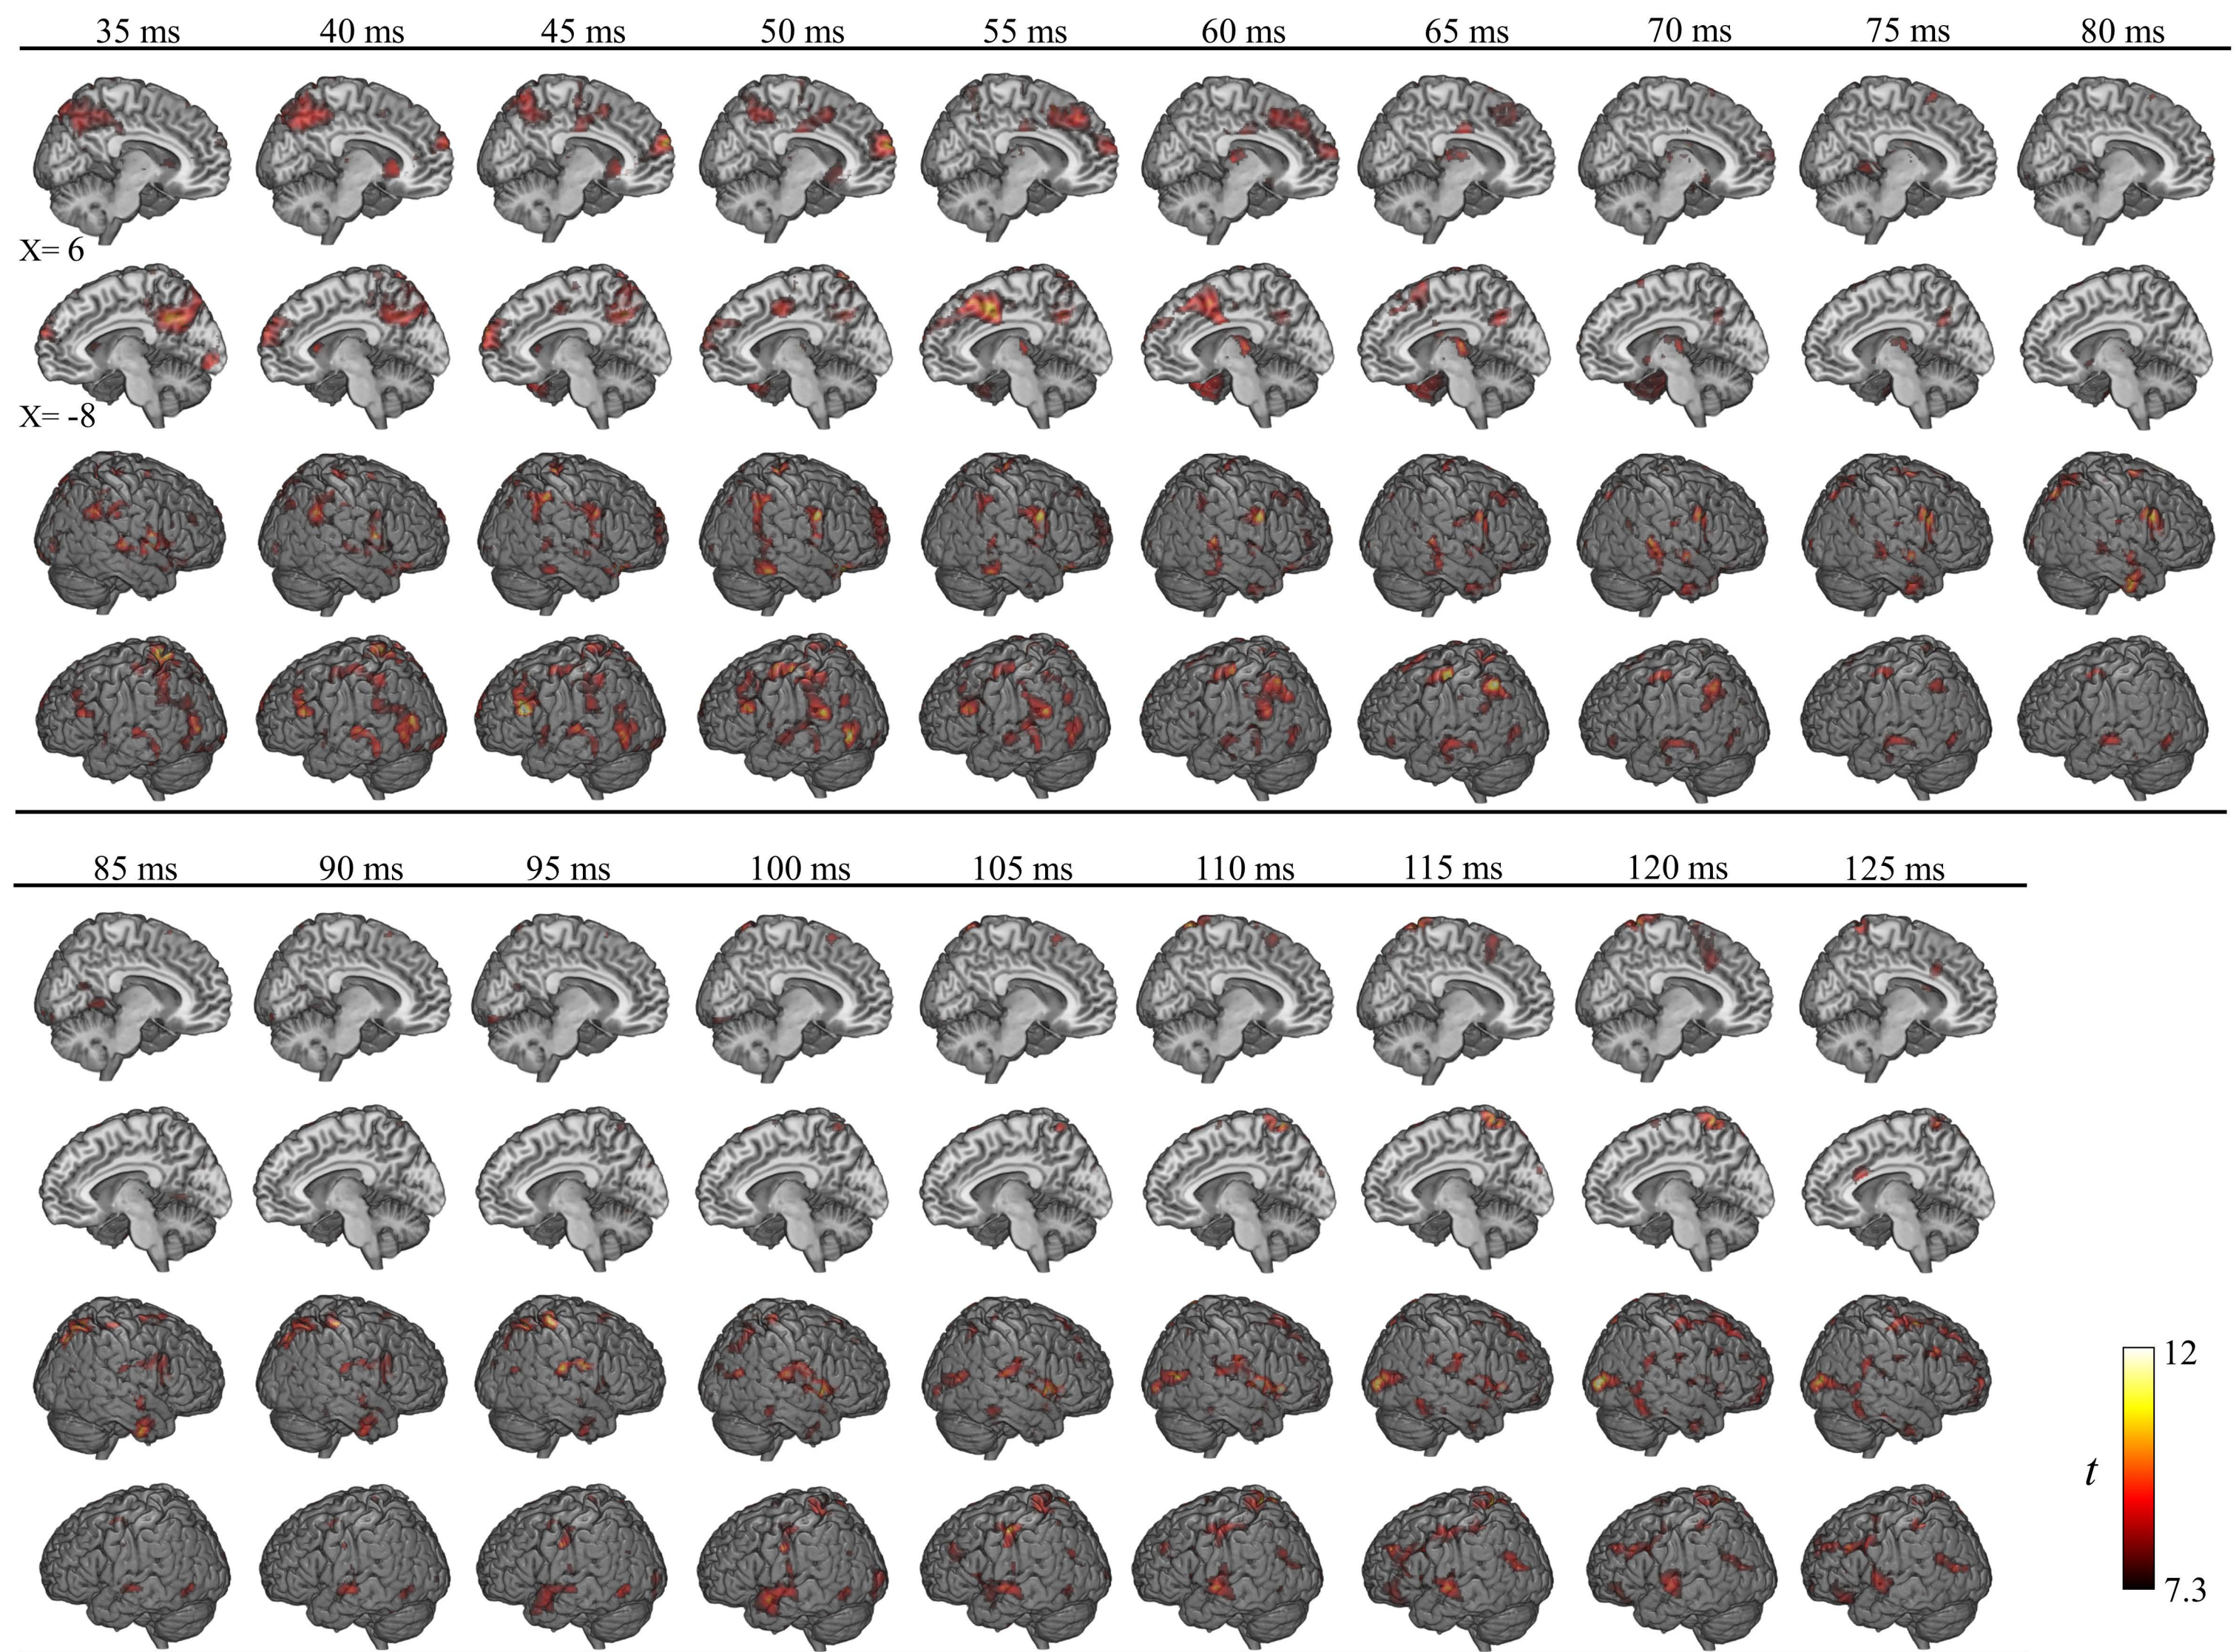



B Happy facial expression

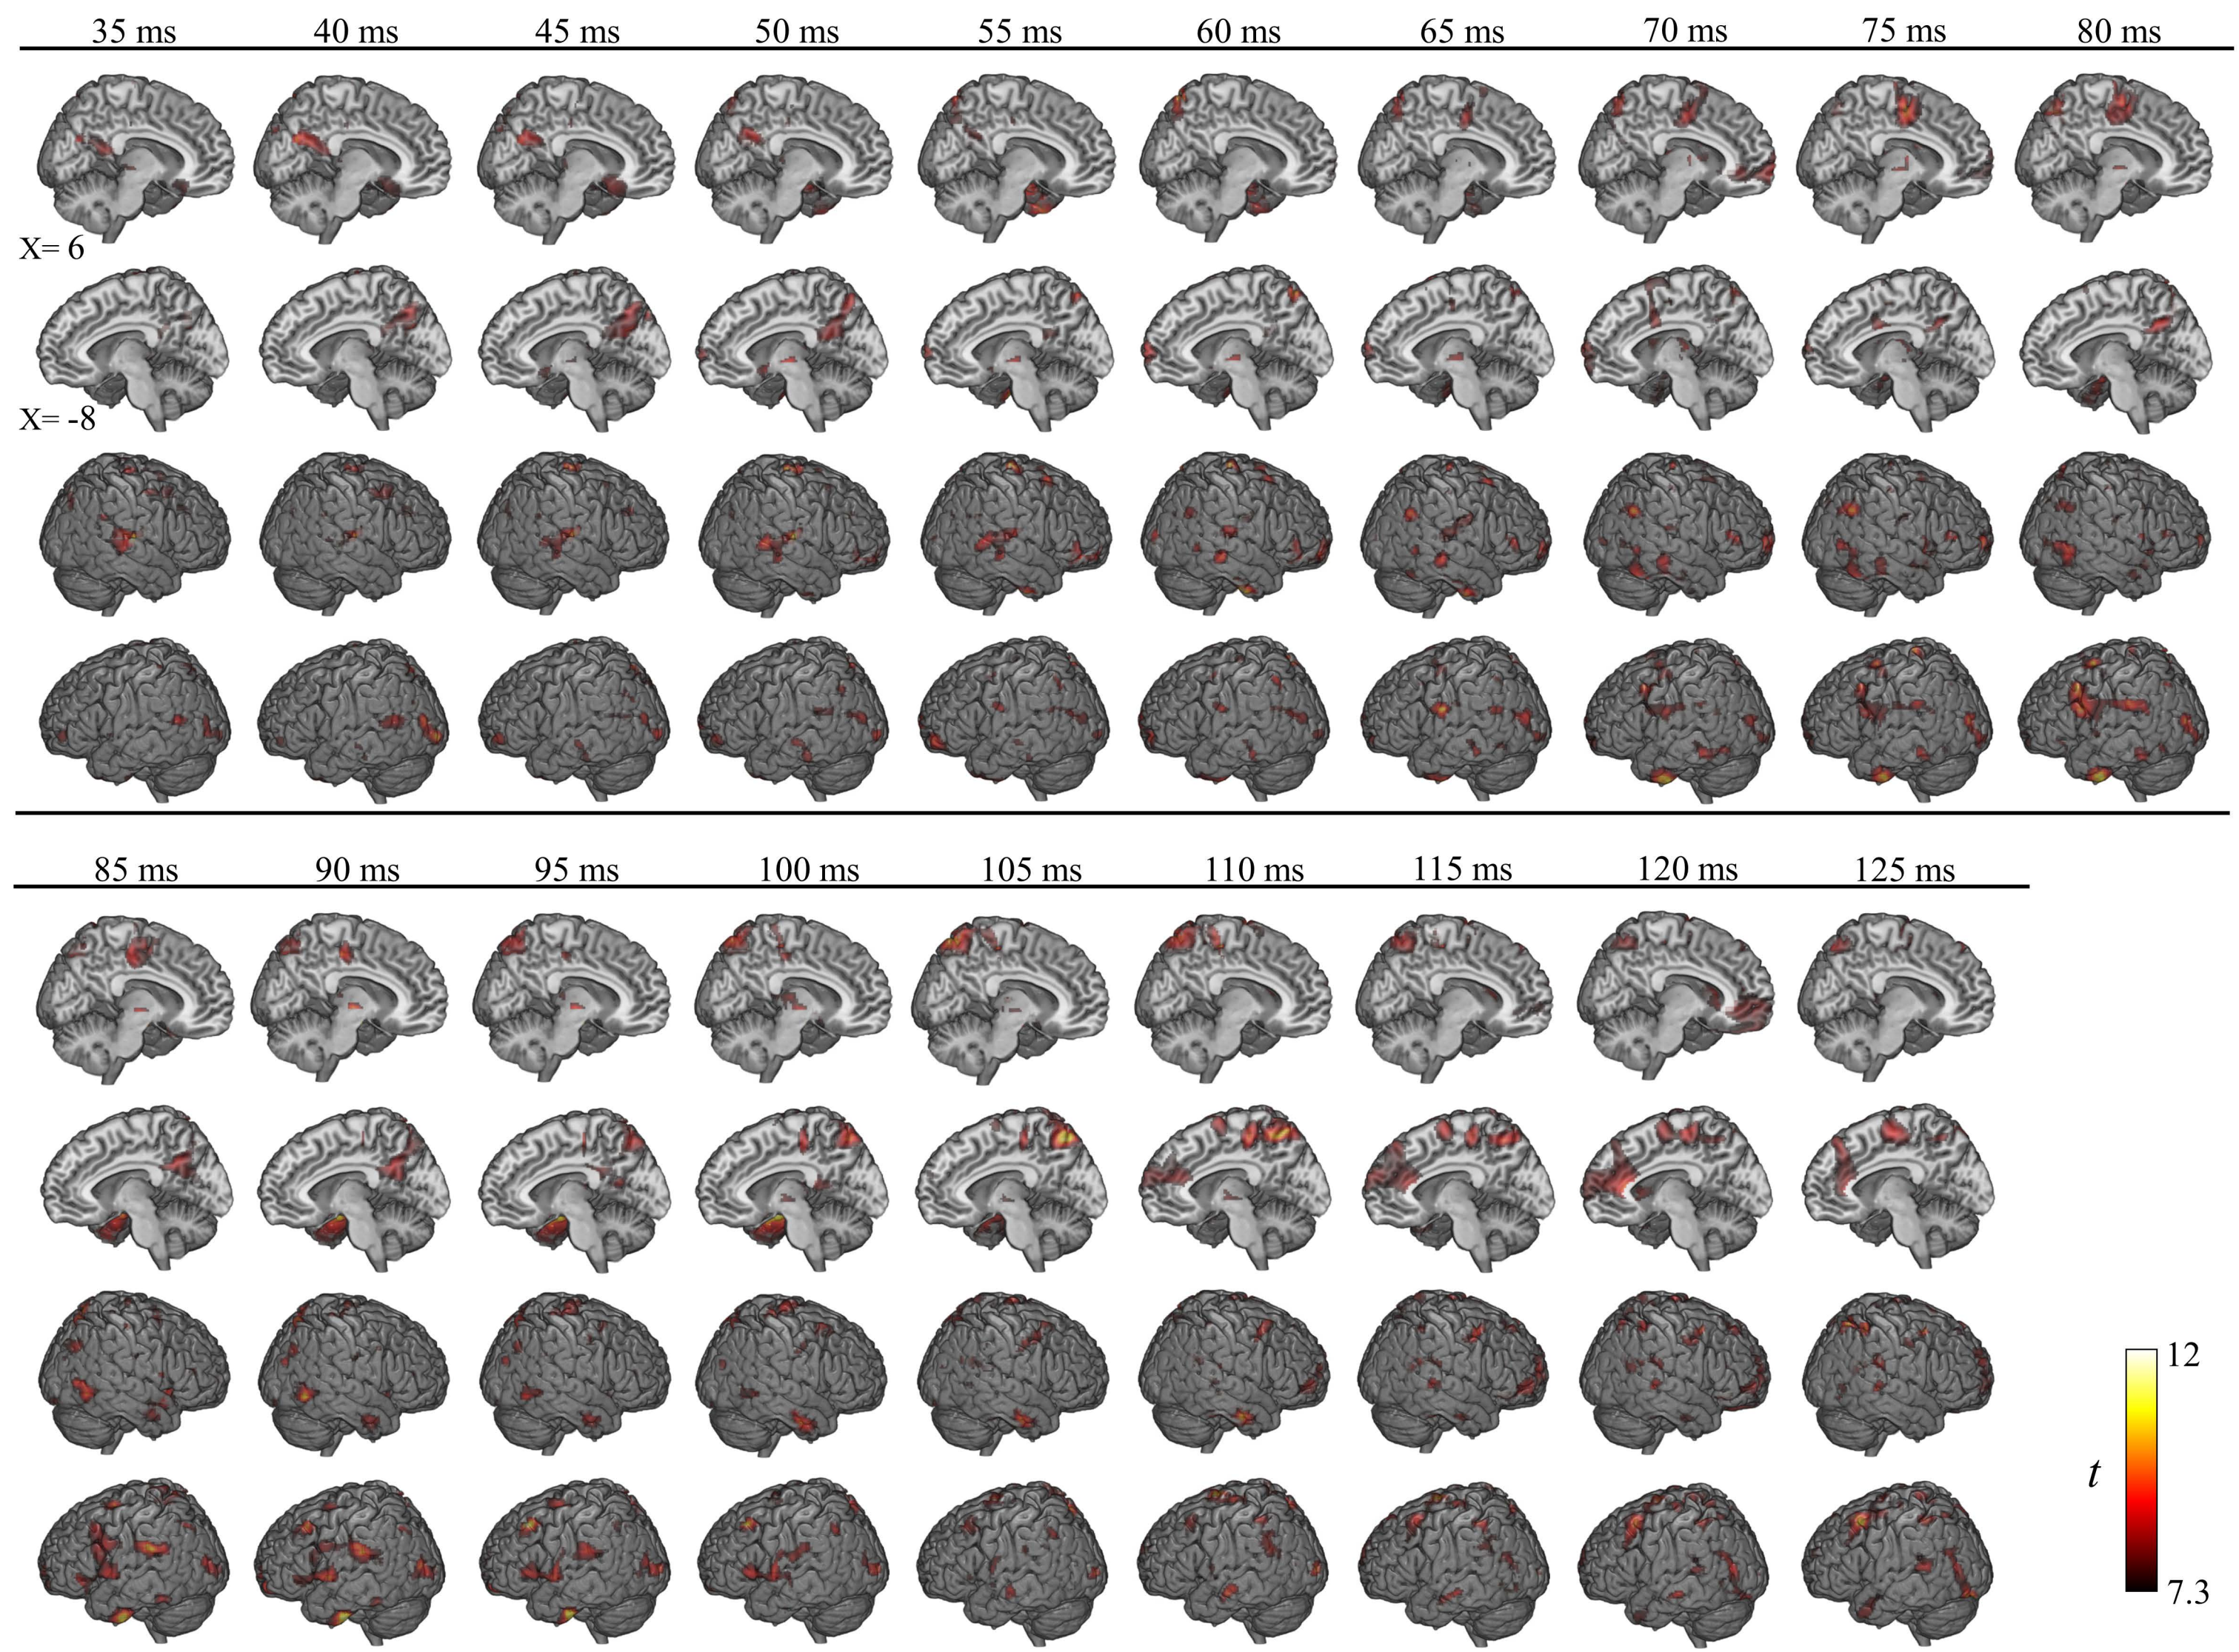



C Neutral facial expression

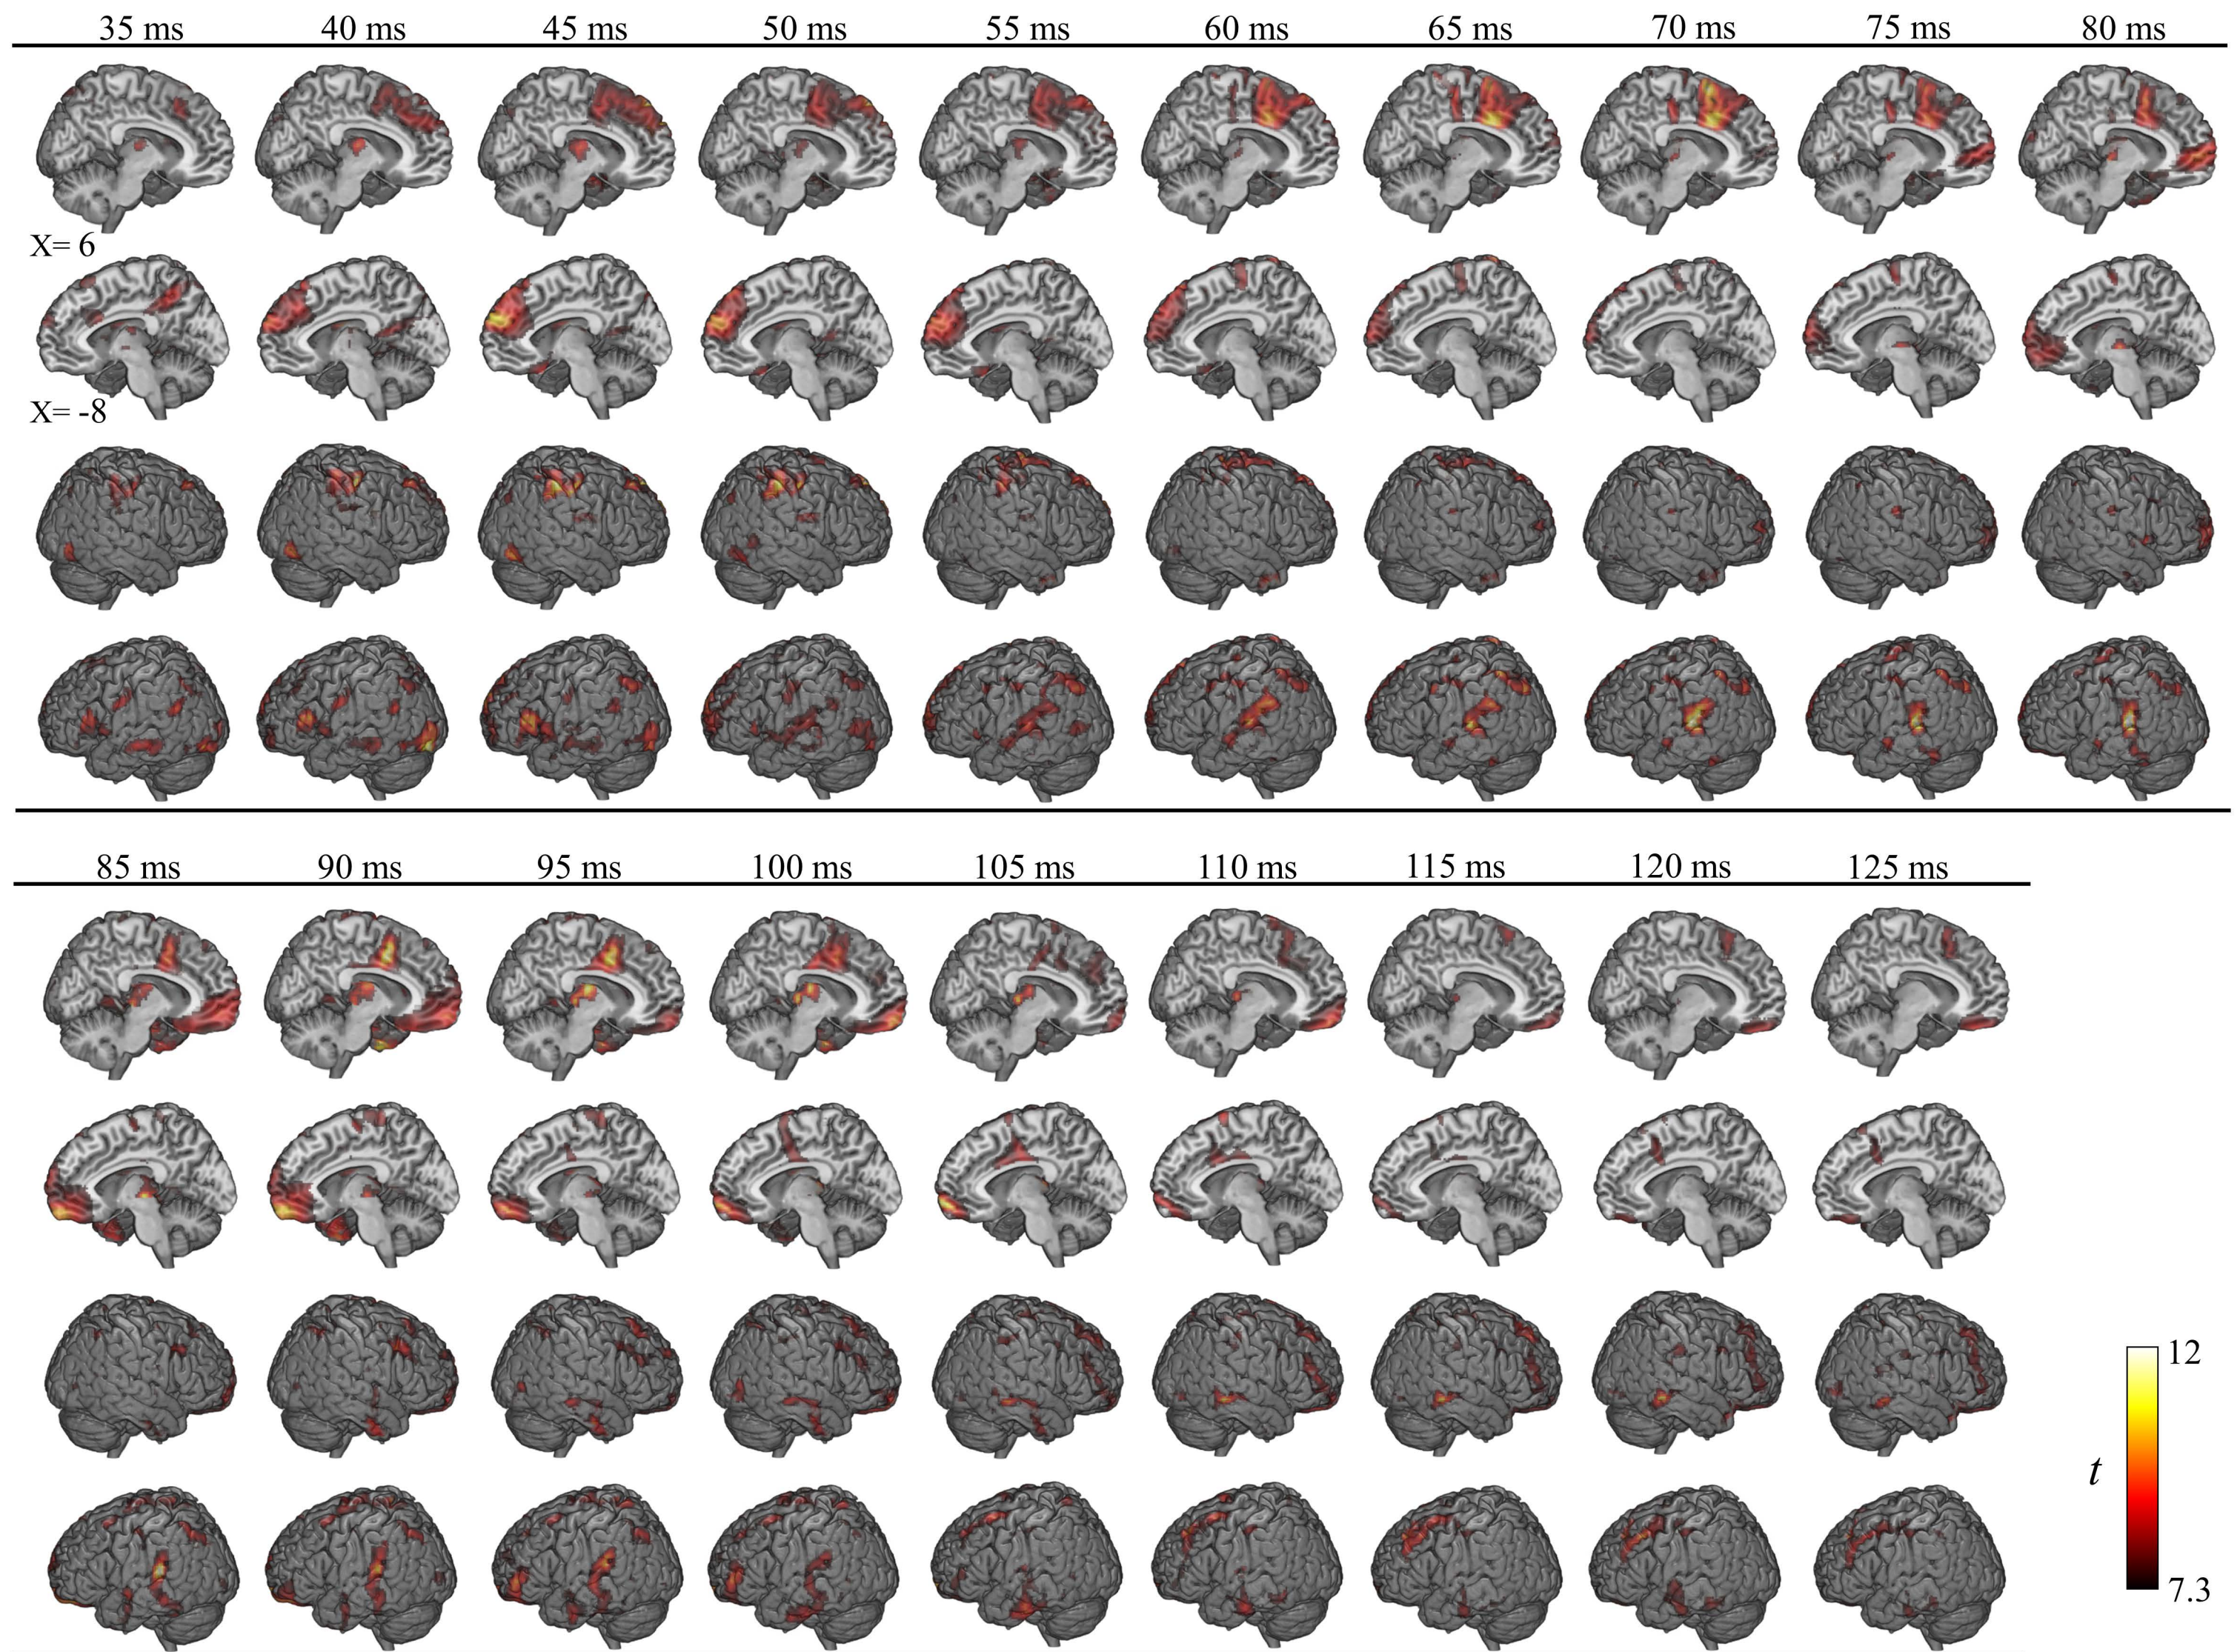

Supplement: S3 (10.1371/journal.pone.0115677.s003) [file journal.pone.0115677.s003]
